# Supplementary material for: Study on Syntaxonomic Diversity of Algal Cenoses in Soils of the Russian Far East, Using an Integrative Taxonomic Approach
Source: MDPI journal article supplement (doi:10.3390/plants13020306), 2024-01-20
Supplement: s1 [file s1]

## Study on syntaxonomic diversity of algal cenoses in soils of the Russian Far East, using integrative taxonomic approach

Shamil R. Abdullin\*, Arthur Yu. Nikulin, Veronika B. Bagmet, Vyacheslav Yu. Nikulin, Elena A. Zharikova, Irina V. Kiseleva, and Andrey A. Gontcharov

**Table S1. Results of genotyping of the isolated algal strains from soils using the BLAST algorithm.**

| Taxa                                                               | Strain     | GenBank accession number | Phylogenetic DNA region | Percentage of identity with the closest strain from NCBI       |
|--------------------------------------------------------------------|------------|--------------------------|-------------------------|----------------------------------------------------------------|
| <i>Coelastrella aeroterrestrica</i> Tschaikner, Gärtner & Kofler   | VCA-240 Ch | OQ873174                 | ITS rDNA                | 100.00% – <i>Coelastrella aeroterrestrica</i> SWK1_2 JX513879  |
|                                                                    | VCA-227 Ch | OQ873175                 | ITS rDNA                | 100.00% – <i>Coelastrella aeroterrestrica</i> IT2-2-2 MW013807 |
|                                                                    | VCA-231 Ch | OQ873176                 | ITS rDNA                | 100.00% – <i>Coelastrella aeroterrestrica</i> HP-29P MZ969857  |
|                                                                    | VCA-221 Ch | OQ873177                 | ITS rDNA                | 99.29% – <i>Coelastrella aeroterrestrica</i> Ru-1-8 MH703752   |
|                                                                    | VCA-34 Ch  | OQ873178                 | ITS rDNA                | 100.00% – <i>Coelastrella aeroterrestrica</i> SWK1_2 JX513879  |
|                                                                    | VCA-32 Ch  | OQ873179                 | ITS rDNA                | 99.88% – <i>Coelastrella aeroterrestrica</i> SWK1_2 JX513879   |
|                                                                    | VCA-225 Ch | OQ873180                 | ITS rDNA                | 100.00% – <i>Coelastrella aeroterrestrica</i> SWK1_2 JX513879  |
| <i>Vischeria magna</i> (Petersen) Kryvenda, Rybalka, Wolf & Friedl | VCA-233 Eu | OQ873181                 | ITS rDNA                | 98.63% – <i>Eustigmatos magnus</i> SAG 2554 MG596348           |
|                                                                    | VCA-27 Eu  | OQ873182                 | ITS rDNA                | 100.00% – <i>Vischeria magna</i> ACSSI 013 MK228872            |
|                                                                    | VCA-29 Eu  | OQ873183                 | ITS rDNA                | 98,88% – <i>Eustigmatos magnus</i> SAG 2554 MG596348           |
|                                                                    | VCA-218 Eu | OQ873184                 | ITS rDNA                | 99.76% – <i>Eustigmatos magnus</i> SAG 2554 MG596348           |

|                                                                                                              |            |           |             |                                                               |
|--------------------------------------------------------------------------------------------------------------|------------|-----------|-------------|---------------------------------------------------------------|
|                                                                                                              | VCA-219 Eu | OQ873185  | ITS rDNA    | 99.76% – <i>Eustigmatos magnus</i> SAG 2554 MG596348          |
|                                                                                                              | VCA-241 Eu | OQ873164  | 18S rDNA    | 100.00% – <i>Vischeria magna</i> ACSSI 081 MK228873           |
|                                                                                                              | VCA-242 Eu | OQ873186  | ITS rDNA    | 99.09% – <i>Vischeria magna</i> SAG 2554 MG596348             |
| <i>Heterochlamydomonas</i> cf. <i>callunae</i> (Ettl) Mikhailyuk & Demchenko                                 | VCA-229 Ch | OQ915509  | 18S rDNA    | 99.75% – <i>Chlamydomonas callunae</i> Us-1-5 MH703756        |
|                                                                                                              | VCA-224 Ch | OQ915510  | 18S rDNA    | 99.75% – <i>Chlamydomonas callunae</i> Us-1-5 MH703756        |
| <i>Bracteacoccus bullatus</i> Fuciková, Flechtner & L.A.Lewis                                                | VCA-228 Ch | OQ873187  | ITS rDNA    | 99.57% – <i>Bracteacoccus bullatus</i> SAG 2032 JQ281848      |
|                                                                                                              | VCA-223 Ch | OQ873188  | ITS rDNA    | 99.57% – <i>Bracteacoccus bullatus</i> SAG 2032 JQ281848      |
|                                                                                                              | VCA-238 Ch | OQ873165  | 18S rDNA    | 100.00% – <i>Bracteacoccus bullatus</i> ACSSI MG582205        |
|                                                                                                              | VCA-216 Ch | OQ873189  | ITS rDNA    | 99.64% – <i>Bracteacoccus bullatus</i> MZ-Ch11 KY066480       |
|                                                                                                              | VCA-244 Ch | OQ873190  | ITS rDNA    | 99.34% – <i>Bracteacoccus bullatus</i> SAG 2032 MW075321      |
| <i>Humidophila contenta</i> (Grunow) Lowe, Kociolek, J.R. Johansen, Van de Vijver, Lange-Bertalot & Kopalová | VCA-214 Ba | OQ835556* | <i>rbcL</i> | 93.21% – <i>Pinnularia</i> cf. <i>gibba</i> 12 EF143304       |
| <i>Chloromonas</i> cf. <i>chlorococcoides</i> (H.Ettl & K.Schwarz) Matsukaki, Y.Hara & Nozaki                | VCA-243 Ch | OQ873191  | ITS rDNA    | 98.83% – <i>Chloromonas chlorococcoides</i> SAG72.81 AB624573 |
| <i>Coelastrella striolata</i> Chodat                                                                         | VCA-217 Ch | OQ873192  | ITS rDNA    | 100% – <i>Coelastrella striolata</i> ACSSI 355 MZ920145       |
| <i>Coelastrella terrestris</i> (Reisigl) Hegewald & N.Hanagata                                               | VCA-222 Ch | OQ873166  | 18S rDNA    | 99.27% – <i>Coelastrella terrestris</i> IRK-A 173 MK504637    |
|                                                                                                              | VCA-234 Ch | OQ873193  | ITS rDNA    | 99.53% – <i>Coelastrella terrestris</i> IRK-A MK504637        |
| <i>Chloromonas</i> cf. <i>reticulata</i> (Goroschankin) Gobi                                                 | VCA-226 Ch | OQ873167  | 18S rDNA    | 98.49% – <i>Chloromonas reticulata</i> ARK-S12-19 OM729982    |
| <i>Edaphochlorella mirabilis</i> (V.M.Andreyeva) Darienko & Pröschold in Darienko & al.                      | VCA-215 Ch | OQ873171  | 18S rDNA    | 100% – <i>Edaphochlorella mirabilis</i> ACSSI 102 MG696560    |
| <i>Mayamaea arida</i> (Bock) Lange-Bertalot                                                                  | VCA-44 Ba  | MZ400876* | <i>rbcL</i> | 94.84% – <i>Mayamaea terrestris</i> NIES-4281 LC648449        |
| <i>Vischeria calaminaris</i> (Trzcinska et Pawlik-Skowronska) Kryvenda, Rybalka, Wolf & Friedl               | VCA-220 Eu | OQ873194  | ITS rDNA    | 99.72% – <i>Vischeria calaminaris</i> E120 JX202554           |
| <i>Vischeria vischeri</i> (Hibberd) Kryvenda, Rybalka, Wolf & Friedl                                         | VCA-30 Eu  | MW013808  | ITS rDNA    | 99.88% – <i>Eustigmatos vischeri</i> CCAP 860/7 KJ713283      |
| <i>Monodopsis subterranea</i> (J.B.Petersen) D.J.Hibberd                                                     | VCA-28 Eu  | MW013813  | ITS rDNA    | 99,69% – <i>Monodopsis subterranea</i> U41054                 |
| <i>Chlamydomonas asymmetrica</i> Korshikov                                                                   | VCA-235 Ch | OQ873195  | ITS rDNA    | 99.81% – <i>Chlamydomonas asymmetrica</i> A2WS ON077054       |
| <i>Chloromonas</i> sp.                                                                                       | VCA-239 Ch | OQ873172  | 18S rDNA    | 99.75% – <i>Chloromonas</i> sp. ACSSI 397 OQ363207            |

|                                                                                                                         |            |          |          |                                                                     |
|-------------------------------------------------------------------------------------------------------------------------|------------|----------|----------|---------------------------------------------------------------------|
| <i>Spongiochloris spongiosa</i> (Vischer) R.C.Starr                                                                     | VCA-236 Ch | OQ873168 | 18S rDNA | 99.90% – <i>Spongiochloris spongiosa</i> CCAP 3/1 MK541715          |
| <i>Protosiphon botryoides</i> (Kützinger) Klebs                                                                         | VCA-230 Ch | OQ873169 | 18S rDNA | 100.00% – <i>Protosiphon botryoides</i> GTD4b-3 KC149964            |
| <i>Bracteacoccus minor</i> (Schmidle ex Chodat) Petrová                                                                 | VCA-232 Ch | OQ915508 | 18S rDNA | 99.07% – <i>Bracteacoccus minor</i> SAG 221-1 MW075319              |
| <i>Coelastrella ellipsoidea</i> (P.M.Novis & G.Visnovksy) K.Gopalakrishnan, P.M.Novis & G.Visnovsky                     | VCA-237 Ch | OQ873170 | 18S rDNA | 99.62% – <i>Coelastrella ellipsoidea</i> LCR-CG7 KC861672           |
| <i>Parietochloris pseudoalveolaris</i> (T.R.Deason & Bold) Shin Watanabe & G.L.Floyd in Deason, Silva, Watanabe & Floyd | VCA-38 Ch  | MW013814 | ITS rDNA | 99.84% – <i>Ettlia pseudoalveolaris</i> NV-5 MT735204               |
| <i>Tetrastichococcus jenerensis</i> (Neustupa, Eliás & Sejnohová) Pröschold & Darienko                                  | VCA-213 Ch | OQ873173 | 18S rDNA | 100.00% – <i>Tetrastichococcus jenerensis</i> KP09HW3001 KX094816   |
| <i>Deuterostichococcus epilithicus</i> Pröschold & Darienko                                                             | VCA-245 Ch | OQ873196 | ITS rDNA | 98.8% – <i>Deuterostichococcus epilithicus</i> SAG 2060 MT07816     |
| <i>Coccomyxa subellipsoidea</i> E.Acton                                                                                 | VCA-246 Ch | OQ873197 | ITS rDNA | 99.56% – <i>Coccomyxa subellipsoidea</i> C-169 FAHX137-B20 AC277064 |

Notes: \* – represent the sequences of new species for the NCBI.
